# Supplementary material for: Molecular physiology of chemical defenses in a poison frog
Source: Oxford University Press journal article supplement (doi:10.1242/jeb.204149), 2019-01-01
Supplement: jeb204149supp.pdf [file jeb204149supp.pdf]

## **Dataset 1**

[Click here to Download Dataset 1](#)
